# Supplementary material
Source: PubMed Central journal article supplement (PMC4004330)
Supplement: nn500110a_si_001.pdf [file nn500110a_si_001.pdf]

# Supporting Information

## Hydrogel Containing Nanoparticle-Stabilized Liposomes for Topical Antimicrobial Delivery

*Weiwei Gao<sup>1,2</sup>, Drew Vecchio<sup>1</sup>, Jieming Li<sup>1</sup>, Jingying Zhu<sup>1,3</sup>, Qiangzhe Zhang<sup>1,2</sup>, Victoria Fu<sup>1,2</sup>,  
Jiayang Li<sup>1</sup>, Soracha Thamphiwatana<sup>1,2</sup>, Diannan Lu<sup>3</sup>, and Liangfang Zhang<sup>1,2,\*</sup>*

<sup>1</sup>Department of NanoEngineering, <sup>2</sup>Moore's Cancer Center, University of California, San Diego,  
La Jolla, California 92093, United States

<sup>3</sup>Department of Chemical Engineering, Tsinghua University, Beijing 100084, China

\*Corresponding author, Tel: 858-246-0999, Email: [zhang@ucsd.edu](mailto:zhang@ucsd.edu)

### **Morphological observation of AuC-liposome hydrogel**

To evaluate the distribution of AuC-liposomes within the hydrogel, the liposomes were first labeled with rhodamine B (RhB) and then used to prepare AuC-liposome hydrogel in a transparent cuvette. The gel contained 0.8 vol% of PEGDMA and 0.5 mol% RhB-DMPE. After the gelation, the hydrogel was examined by using an Olympus-MVX10 Macro View microscope. Under the bright field mode (**Figure S1 A**), the gel showed a vibrant cherry red color characteristic to gold nanoparticles with a uniform distribution. The hydrogel was also examined under the fluorescence mode to reveal the liposome distribution. The fluorescence image (**Figure S1 B**) showed that the liposomes were uniformly distributed throughout the hydrogel. No liposome accumulation or aggregation was observed.

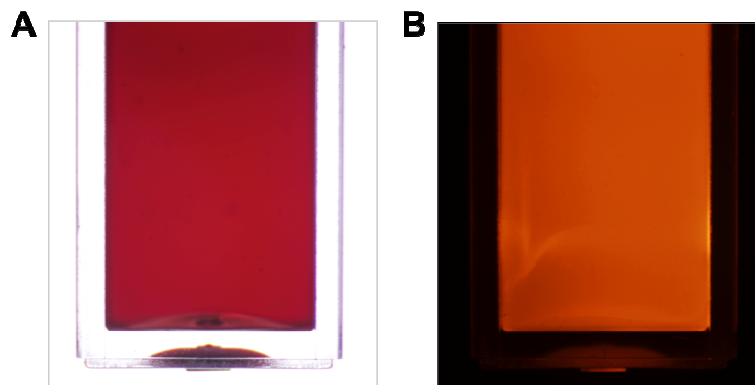

**Figure S1.** Morphological observation of AuC-liposome hydrogel containing 0.8 vol% of PEGDMA and 0.5 mol% RhB-DMPE under (A) bright field mode, and (B) fluorescence mode.

### **Stability of gold nanoparticles in the hydrogel**

To study the stability of gold nanoparticles in the AuC-liposome hydrogel, the hydrogel containing 0.8 vol% of PEGDMA was cast in a 96-well plate and the plate was stored at 4°C for 7 days. After the storage, the gel in the plate together with a batch of freshly prepared AuC was measured for absorption by using a spectrophotometer (Infinite M200, TECAN, Switzerland). As show in **Figure S2**, the absorption spectra of the freshly prepared AuC and the hydrogel-bound AuC overlapped, suggesting the absence of gold aggregation in the hydrogel form after 7 days of storage.

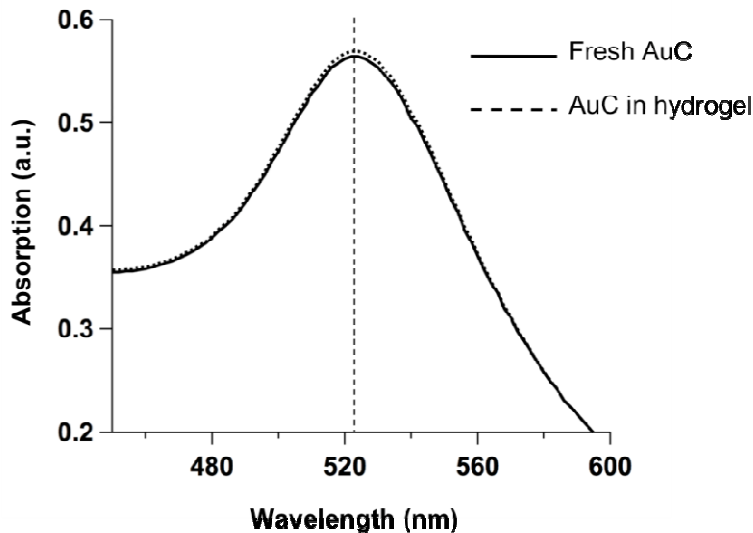

**Figure S2.** The comparison of the absorption spectra of the freshly prepared AuC and the hydrogel-bound AuC stored for 7 days.

### AuC-liposome stability under prolonged hydrogel incubation

In the study, a hydrogel sample (5 mL, containing 0.8 vol% of PEGDMA) was cast in a 50 mL Eppendoff tube. Following the gelation, 25 mL water (pH = 7.4) was added onto the top of the gel and the tube was incubated at 37°C. Every 24 hrs, 1 mL of the supernatant was taken from the tube and DLS measurements were performed for the size and zeta-potential of the released liposomes. As shown in **Figure S3**, within a 7-day period, the size and zeta potential of the released liposomes remained constant. The results suggest that under prolonged hydrogel incubation (7 days), the released AuC-liposomes remain stable at physiological pH.

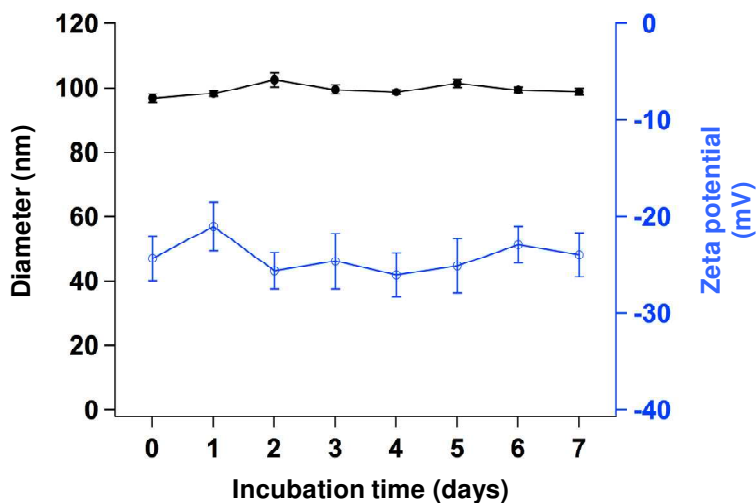

**Figure S3.** The size and surface zeta potential of the released AuC-liposomes when the gel was incubated in pH = 7.4 water at 37°C for a period of 7 days.
